# Supplementary material for: Highly soluble olanzapinium maleate crystalline salts
Source: Royal Society of Chemistry journal article supplement (doi:10.1039/c0ce00787k), 2011-01-01
Supplement: c0ce00787k.pdf [file c0ce00787k.pdf]

## Electronic Supplementary Information†

### Highly soluble olanzapinium maleate crystalline salts †

Ranjit Thakuria and Ashwini Nangia\*

*School of Chemistry, University of Hyderabad, Prof. C. R. Rao Road, Gachibowli,  
Central University PO, Hyderabad 500 046, India; E-mail: ashwini.nangia@gmail.com*

#### Crystallization Experimental

##### Single crystals

###### Olanzapinium monomaleate 1:1 salt

30 mg (0.1 mmol) of olanzapine and 6 mg (0.05 mmol) of maleic acid were taken in a mortar-pestle, 10-15 drops of ethyl acetate was added, the material was manually ground for 15 min, and then dissolved in 15 mL ethyl acetate-acetone mixture and left for slow evaporation at room temperature.

###### Olanzapinium dimaleate 1:2 salt

30 mg (0.1 mmol) of olanzapine, 17 mg (0.1 mmol) of aspirin and 6 mg (0.05 mmol) of maleic acid were taken in a mortar-pestle, 10-15 drops of ethyl acetate was added, the material was manually ground for 15 min, and then dissolved in 20 mL ethyl acetate-nitromethane mixture and left for slow evaporation at room temperature.

##### Powder material

###### Amorphous salts of olanzapine and maleic acid

To prepare the 1:1 and 1:2 salt, 30 mg (0.1 mmol) of olanzapine was mixed with the stoichiometric amount of maleic acid required in a mortar-pestle and manually ground for 10-15 min without the addition of any solvent (neat grinding). The resultant solid was characterized by XRPD, thermal and spectral methods.

###### Crystalline salts of olanzapine and maleic acid

1:1 and 1:2 crystalline salts were prepared by mixing 30 mg (0.1 mmol) of olanzapine with the stoichiometric amount of maleic acid required in a mortar-pestle, 10-15 drops of acetonitrile was added and manually ground for 15-20 min (liquid-assisted grinding). The resultant solid was characterized by XRPD, thermal and spectral methods. The XRPD of the bulk material matched with the calculated lines for the crystal structure.

**Table S1** Crystallographic data of olanzapinium maleate 1:1 and 1:2 salts.

| Compound                                           | Olanzapinium monomaleate 1:1 salt                               | Olanzapinium dimaleate 1:2 salt                                 |
|----------------------------------------------------|-----------------------------------------------------------------|-----------------------------------------------------------------|
| chemical formula                                   | C <sub>21</sub> H <sub>24</sub> N <sub>4</sub> O <sub>4</sub> S | C <sub>25</sub> H <sub>28</sub> N <sub>4</sub> O <sub>8</sub> S |
| formula weight                                     | 428.50                                                          | 544.57                                                          |
| crystal system                                     | monoclinic                                                      | Triclinic                                                       |
| space group                                        | <i>P</i> 2 <sub>1</sub> / <i>n</i>                              | <i>P</i> $\bar{1}$                                              |
| <i>T</i> / <i>K</i>                                | 298(2)                                                          | 298(2)                                                          |
| <i>a</i> /Å                                        | 10.852(5)                                                       | 8.518(3)                                                        |
| <i>b</i> /Å                                        | 13.748(7)                                                       | 9.804(4)                                                        |
| <i>c</i> /Å                                        | 13.879(7)                                                       | 16.210(6)                                                       |
| $\alpha$ /°                                        | 90                                                              | 95.956(7)                                                       |
| $\beta$ /°                                         | 97.856(8)                                                       | 97.945(7)                                                       |
| $\gamma$ /°                                        | 90                                                              | 107.789(7)                                                      |
| <i>Z</i>                                           | 4                                                               | 2                                                               |
| <i>V</i> /Å <sup>3</sup>                           | 2051.3(17)                                                      | 1261.2(8)                                                       |
| <i>D</i> <sub>calc</sub> /g cm <sup>-3</sup>       | 1.387                                                           | 1.434                                                           |
| $\mu$ /mm <sup>-1</sup>                            | 0.194                                                           | 0.186                                                           |
| reflns collected                                   | 20986                                                           | 13184                                                           |
| unique reflns                                      | 4054                                                            | 4971                                                            |
| observed reflns                                    | 3375                                                            | 3737                                                            |
| <i>R</i> <sub>1</sub> [ <i>I</i> > 2σ( <i>I</i> )] | 0.0418                                                          | 0.0864                                                          |
| <i>wR</i> <sub>2</sub> [all]                       | 0.1125                                                          | 0.1789                                                          |
| goodness-of-fit                                    | 1.068                                                           | 1.243                                                           |
| diffractometer                                     | SMART-APEX CCD                                                  | SMART-APEX CCD                                                  |

**Table S2** Hydrogen bonds in crystal structures of olanzapinium maleate 1:1 and 1:2 salts. O–H, N–H and C–H distances are neutron-normalized to 0.983, 1.009 and 1.083 Å.

| Interaction                           | H...A/ Å | D...A/ Å | ∠D–H...A/° | Symmetry code |
|---------------------------------------|----------|----------|------------|---------------|
| Olanzapinium monomaleate 1:1 salt     |          |          |            |               |
| N3 <sup>+</sup> –H3...O4 <sup>-</sup> | 1.70     | 2.648(2) | 155.5      | ---           |

|                                       |      |          |       |                                                |
|---------------------------------------|------|----------|-------|------------------------------------------------|
| N4–H4···O1                            | 2.04 | 3.018(3) | 161.9 | $\frac{1}{2}-x, -\frac{1}{2}+y, \frac{3}{2}-z$ |
| C16–H16A···N4                         | 2.53 | 3.537(3) | 155.1 | $\frac{1}{2}+x, \frac{1}{2}-y, \frac{1}{2}+z$  |
| C18–H18B···N1                         | 2.25 | 2.680(3) | 101.0 | <sup>a</sup>                                   |
| Olanzapinium dimaleate 1:2 salt       |      |          |       |                                                |
| N1 <sup>+</sup> –H1···O1 <sup>-</sup> | 1.86 | 2.825(5) | 159.2 | 1-x, -y, 1-z                                   |
| N3 <sup>+</sup> –H3···O5 <sup>-</sup> | 1.66 | 2.656(5) | 170.1 | x, -1+y, z                                     |
| N4–H4···O1                            | 1.89 | 2.885(5) | 166.6 | x, y, -1+z                                     |
| C10–H10A···O7                         | 2.44 | 3.397(6) | 146.4 | 1+x, y, z                                      |
| C15–H15A···O6                         | 2.35 | 3.348(6) | 151.8 | x, -1+y, z                                     |
| C19–H19A···O5 <sup>-</sup>            | 2.29 | 3.359(6) | 170.9 | 2-x, 1-y, 1-z                                  |
| C19–H19B···O8                         | 2.32 | 3.290(7) | 148.8 | 1-x, 1-y, 1-z                                  |

<sup>a</sup> Intramolecular hydrogen bond.

**Table S3** FT-IR characterization of the olanzapinium maleate salts.

|                                      | Olanzapine base               | Maleic acid | Crystalline olanzapinium monomaleate (1:1 salt) | Amorphous olanzapinium monomaleate (1:1 salt) | Crystalline olanzapinium dimaleate (1:2 salt) | Amorphous olanzapinium dimaleate (1:2 salt) |
|--------------------------------------|-------------------------------|-------------|-------------------------------------------------|-----------------------------------------------|-----------------------------------------------|---------------------------------------------|
| N–H Stretching                       | 3442.2 (asym)<br>3220.6 (sym) | –           | 3441.4 (asym)<br>3260.9 (sym)                   | 3430.7 (asym)<br>3242.5 (sym)                 | 3435.3 (asym)<br>3253.3 (sym)                 | 3431.4 (asym)<br>3245.0 (sym)               |
| O–H Stretching                       | –                             | 3058.6      | 3057.1                                          | 3050.7                                        | 3120.1                                        | 3115.9                                      |
| benzene ring C–H stretching          | 3013.1                        | –           | 3018.9                                          | 3016.8                                        | 3017.7                                        | 3013.8                                      |
| C–H stretching (of CH <sub>3</sub> ) | 2933.3,<br>2837.3             | 2921.4      | 2920.4, 2859.0                                  | 2926.2,<br>2844.1                             | 2958.5                                        | 2927.7                                      |
| C=C stretching (aromatic)            | 1470.3                        | –           | 1468.5                                          | 1467.2                                        | 1470.7                                        | 1508.8                                      |
| C=O stretching                       | –                             | 1706.8      | 1699.0                                          | 1701.4                                        | 1703.2                                        | 1701.4                                      |
| N–H bending                          | 1585.1                        | –           | 1591.3                                          | 1589.7                                        | 1585.0                                        | 1588.8                                      |
| C=O bending                          | –                             | 1264.6      | 1368.6                                          | 1352.1                                        | 1383.1                                        | 1383.9                                      |

A strong interaction results in red shift for N–H stretching frequency.

**Table S4** FT-NIR characterization of the olanzapinium maleate salts.

|                       | Olanzapine base                                | Maleic acid                            | Crystalline olanzapinium monomaleate (1:1 salt) | Amorphous olanzapinium monomaleate (1:1 salt) | Crystalline olanzapinium dimaleate (1:2 salt) | Amorphous olanzapinium dimaleate (1:2 salt) |
|-----------------------|------------------------------------------------|----------------------------------------|-------------------------------------------------|-----------------------------------------------|-----------------------------------------------|---------------------------------------------|
| Ar C–H first overtone | 5959.8, 5890.4                                 | –                                      | 5932.5, 5874.3                                  | 5951.5, 5785.9                                | 5962.3                                        | 5953.3                                      |
| O–H first overtone    | –                                              | 5980.2                                 |                                                 |                                               |                                               |                                             |
| C=O second overtone   | –                                              |                                        | 5164.4 (new)                                    | 5164.4 (new)                                  | 5104.2 (new)                                  | 5158.6 (new)                                |
| N–H combination       | 4846.9, 4770.9, 4645.0                         | –                                      |                                                 |                                               |                                               |                                             |
| N–H + O–H combination | –                                              | –                                      | 4733.2, 4665.1                                  | 4739.5, 4655.6                                | 4736.3, 4661.1                                | 4738.0, 4667.5                              |
| O–H + C=O combination | –                                              | 4758.5                                 |                                                 |                                               |                                               |                                             |
| C–H combination       | 4428.8, 4356.2, 4315.8, 4257.8, 4149.3, 4084.5 | 4492.3, 4426.9, 4384.5, 4320.0, 4273.5 | 4428.7, 4393.2, 4310.3, 4269.2, 4165.6, 4081.7  | 4426.1, 4321.8, 4083.8                        | 4441.7, 4406.3, 4331.9, 4181.8                | 4434.7, 4318.1, 4249.9, 4083.7              |

**Table S5** FT-Raman characterization of the olanzapinium maleate salts.

|                                      | Olanzapine base | Maleic acid | Crystalline olanzapinium monomaleate (1:1 salt) | Amorphous olanzapinium monomaleate (1:1 salt) | Crystalline olanzapinium dimaleate (1:2 salt) | Amorphous olanzapinium dimaleate (1:2 salt) |
|--------------------------------------|-----------------|-------------|-------------------------------------------------|-----------------------------------------------|-----------------------------------------------|---------------------------------------------|
| N–H Stretching                       | 3061.6          | –           | 3064.7                                          | 3055.8                                        | 3071.5                                        | 3046.9                                      |
| benzene ring C–H stretching          | 2988.5          | –           | 2989.9                                          | 2997.7                                        | 2988.3                                        | 3005.8                                      |
| C–H stretching (of CH <sub>3</sub> ) | 2940.3, 2916.1  | 3059.2      | 2950.8, 2920.5                                  | 2953.2, 2921.5                                | 2964.2, 2935.9                                | 2962.3, 2926.5                              |
| C=O stretching                       | –               | 1700.4      | 1698.1                                          | 1696.5                                        | 1698.0                                        | 1702.3                                      |
| N–H bending                          | 1517.9          | –           | 1515.6                                          | 1516.4                                        | 1591.4                                        | 1608.6                                      |
| C=O bending                          | –               | 1330.6      | 1370.8                                          | 1381.8                                        | 1379.6                                        | 1382.9                                      |

**Table S6** ss-NMR chemical shift ( $\delta$ , ppm) and peak assignment for olanzapinium maleate salts.

| Sites           | Olanzapine | Crystalline 1:1 salt | Amorphous 1:1 salt | Crystalline 1:2 salt |
|-----------------|------------|----------------------|--------------------|----------------------|
| <sup>13</sup> C |            |                      |                    |                      |
| C10             | 15.59      | 14.64                | 15.55              | 16.70                |

|                  |        |        |                |             |
|------------------|--------|--------|----------------|-------------|
| C18              | 44.30  | 43.30  | 43.93          | 42.18       |
| C15              | 45.68  | 47.30  | 45.73          | 43.96       |
| C16              | 52.85  | 51.93  | 52.75          | 50.79       |
| C17              | 53.32  | 52.61  | 53.32          | 52.24       |
| C19              | 48.26  | 41.53  | 48.23          | 47.24       |
| C14              | 116.49 | 123.54 | 120.20         | 104.35      |
| C13              | 120.27 | 125.16 | 121.12         | 123.13      |
| C12              | 120.99 | 127.06 | 122.04         | 124.79      |
| C8               | 122.00 | 128.59 | 122.96         | 127.09      |
| C11              | 123.44 | 133.39 | 124.54         | 128.57      |
| C6               | 124.58 | 134.97 | 127.05         | 131.50      |
| C9               | 126.97 | 135.88 | 135.77         | 134.97      |
| C2               | 139.19 | 136.99 | 139.29         | 135.88      |
| C3               | 145.16 | 139.76 | 144.80         | 147.10      |
| C5               | 156.20 | 141.38 | 155.78         | 163.01      |
| C7               | 159.61 | 155.21 | 159.71         | 166.56      |
| C20 <sup>a</sup> |        | 170.18 | 168.13 (broad) | 172.08 (2C) |
| C23 <sup>a</sup> |        | 166.18 | 168.34 (broad) | 170.14 (2C) |
| C21 <sup>a</sup> |        | 117.59 | 116.38         | 121.74 (2C) |
| C22 <sup>a</sup> |        | 115.22 | 115.59         | 120.71 (2C) |

<sup>a</sup>Maleic acid.

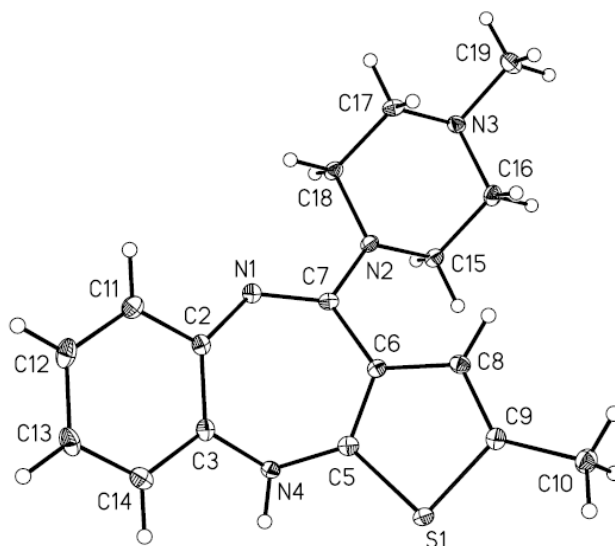

(a)

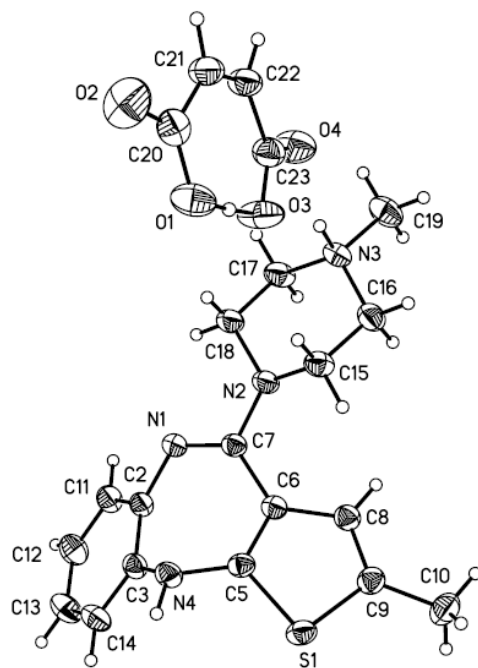

(b)

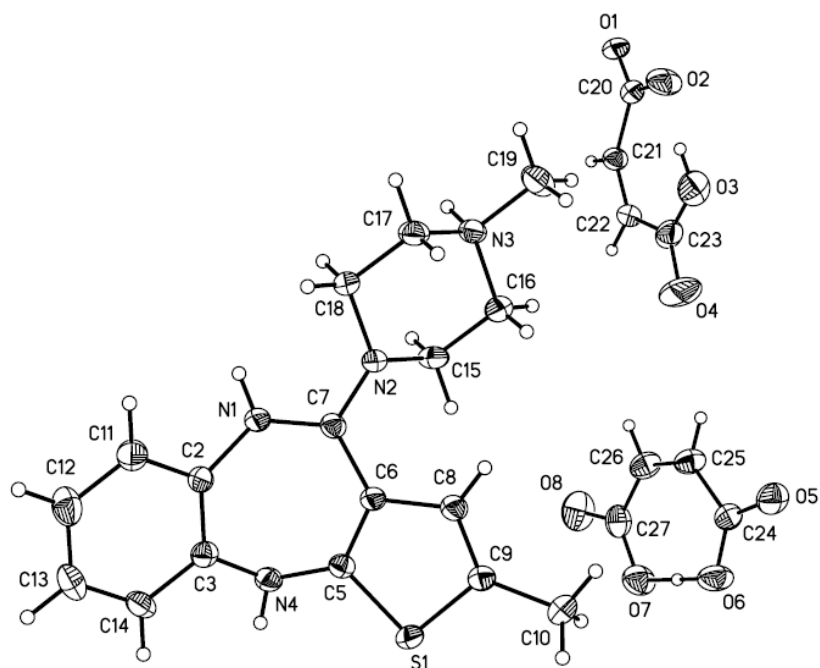

(c)

**Figure S1** ORTEP of (a) olanzapine base (b) olanzapinium monomaleate 1:1 salt and (c) olanzapinium dimaleate 1:2 salt.

**Table S7** CHN analysis of the amorphous salts.

a. Amorphous Olanzapinium monomaleate 1:1 salt (molecular weight: 428.50 gm)

| Atom | Calculated % | Experimental % |
|------|--------------|----------------|
| C    | 58.81        | 58.69          |
| H    | 5.60         | 5.56           |
| N    | 13.07        | 13.28          |

b. Amorphous Olanzapinium dimaleate 1:2 salt (molecular weight: 544.57 gm)

| Atom | Calculated % | Experimental % |
|------|--------------|----------------|
| C    | 55.08        | 55.16          |
| H    | 5.14         | 5.51           |
| N    | 10.28        | 10.22          |

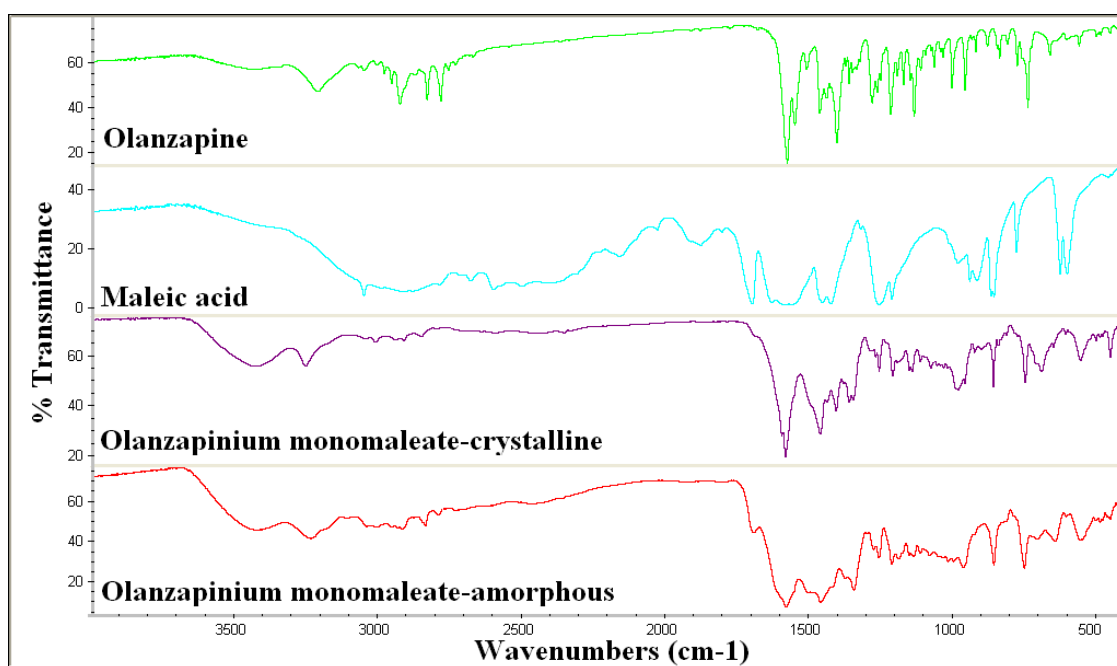

**Figure S2** IR spectra of olanzapinium monomaleate 1:1 salt.

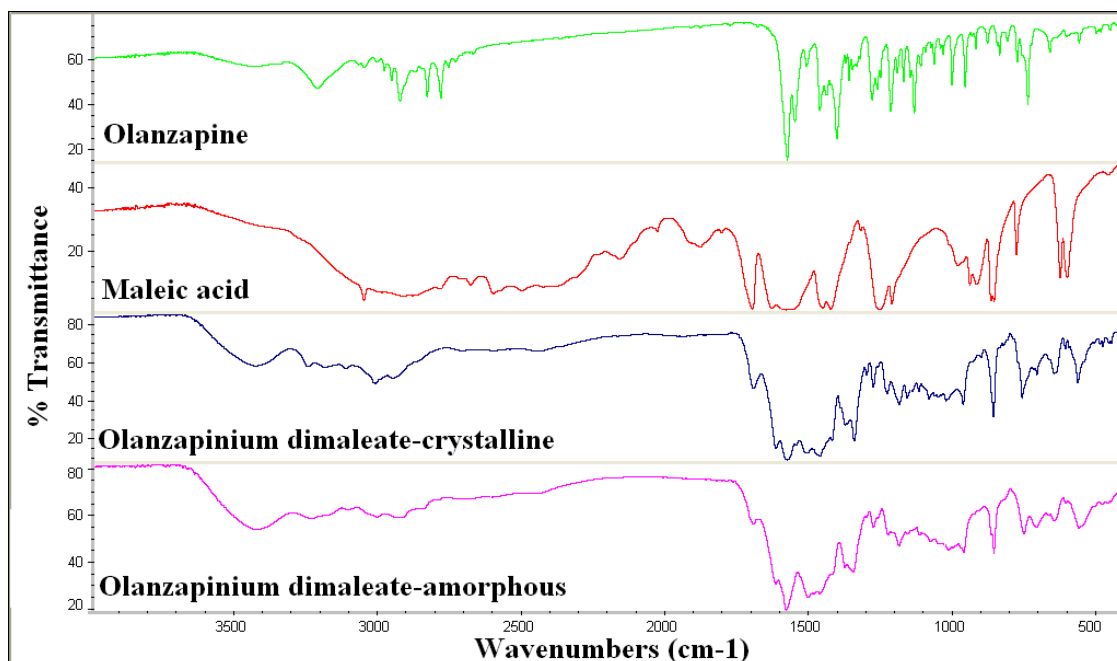

Figure S3 IR spectra olanzapinium dimaleate 1:2 salt.

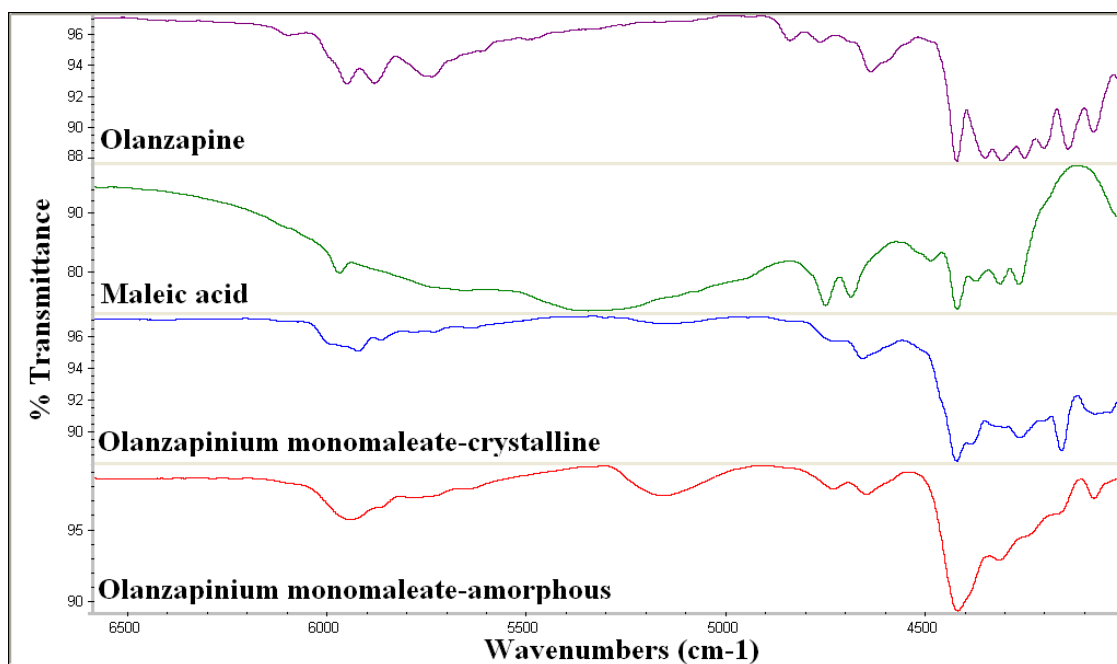

Figure S4 NIR spectra of olanzapinium monomaleate 1:1 salt.



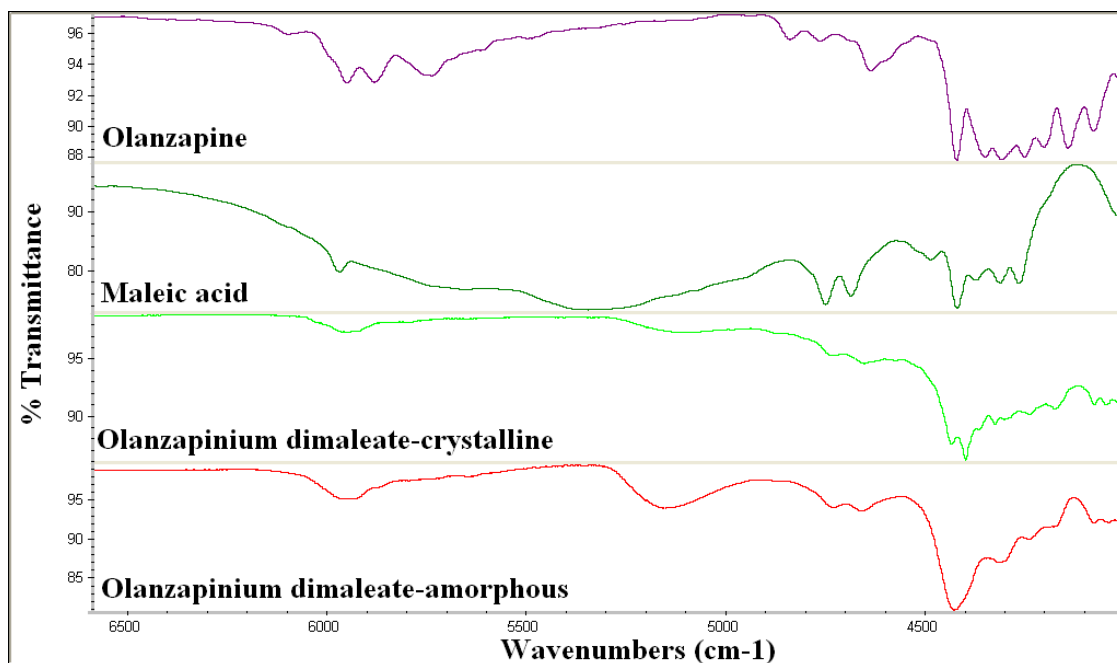

Figure S5 NIR spectra of olanzapinium dimaleate 1:2 salt.

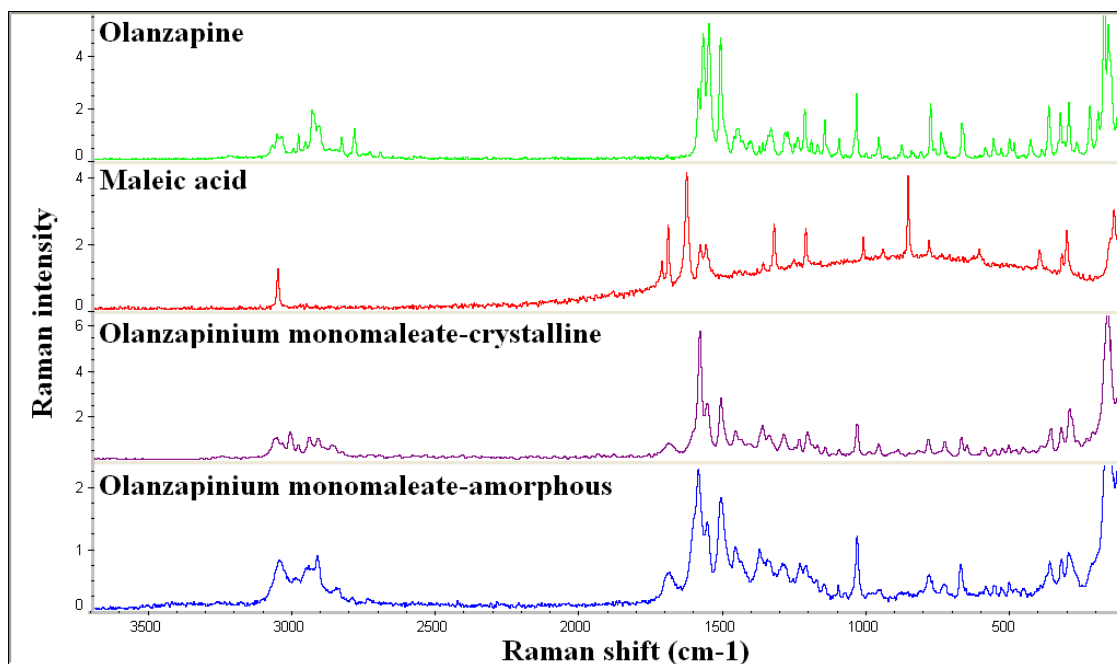

Figure S6 Raman spectra of olanzapinium monomaleate 1:1 salt.

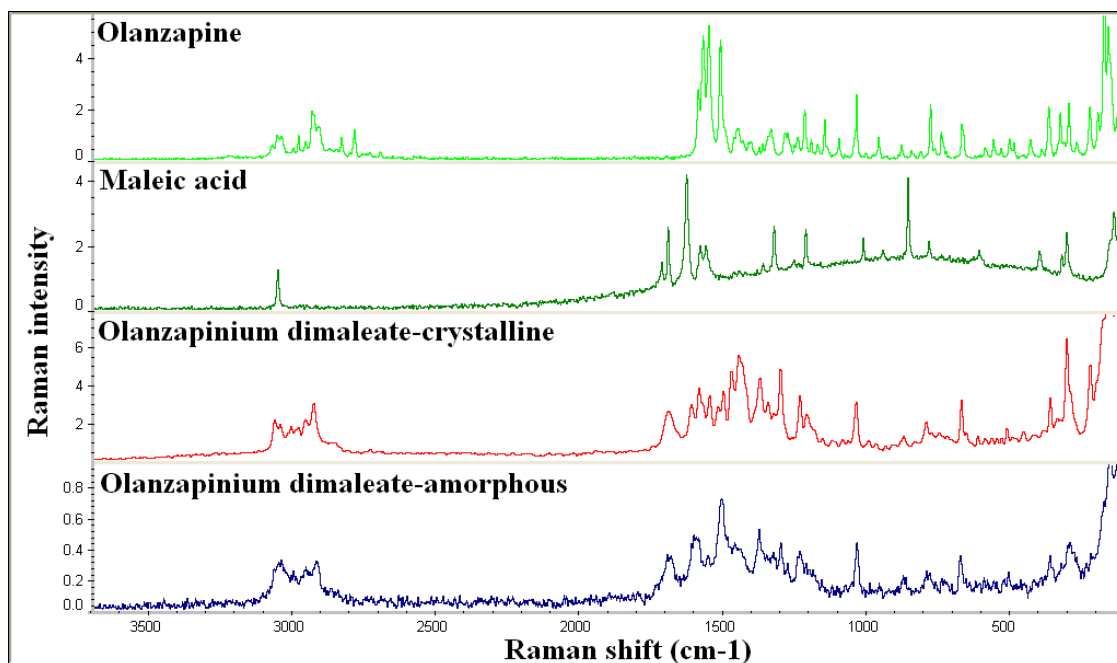

Figure S7 Raman spectra of olanzapinium dimaleate 1:2 salt.

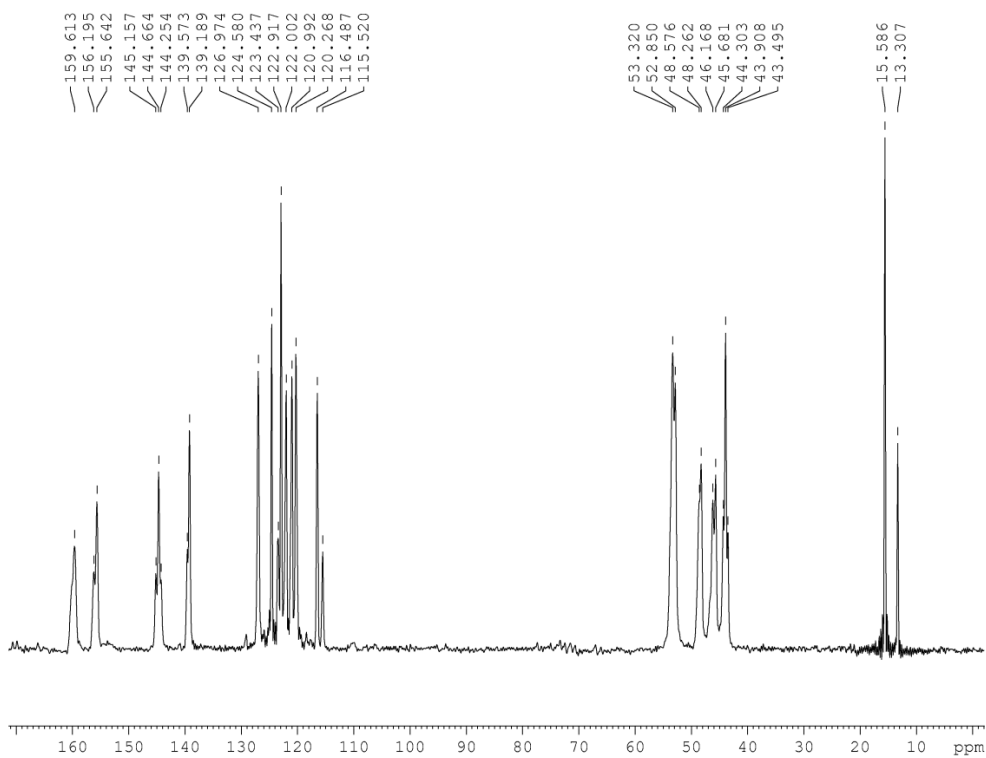

Figure S8 ss-NMR of olanzapine base.

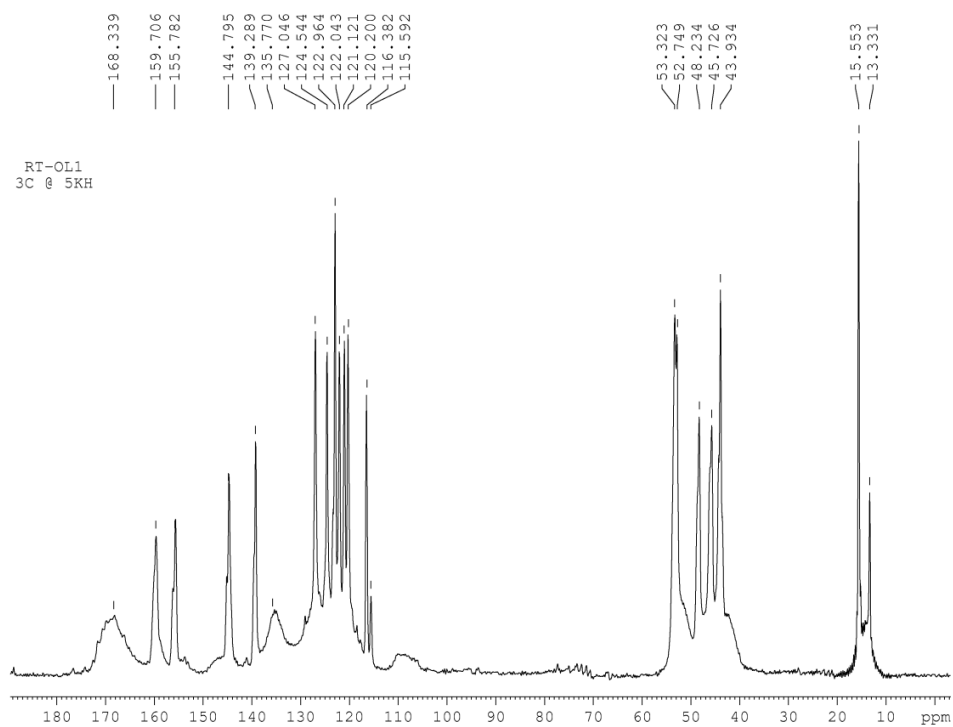

Figure S9 ss-NMR of amorphous olanzapinium monomaleate 1:1 salt.

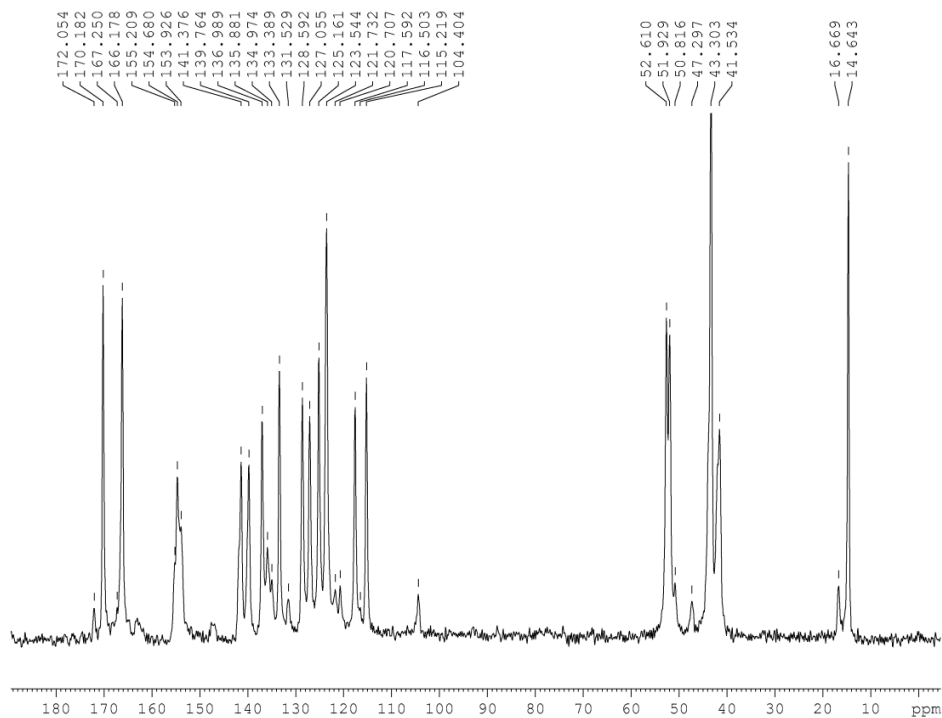

Figure S10 ss-NMR of crystalline olanzapinium monomaleate 1:1 salt.

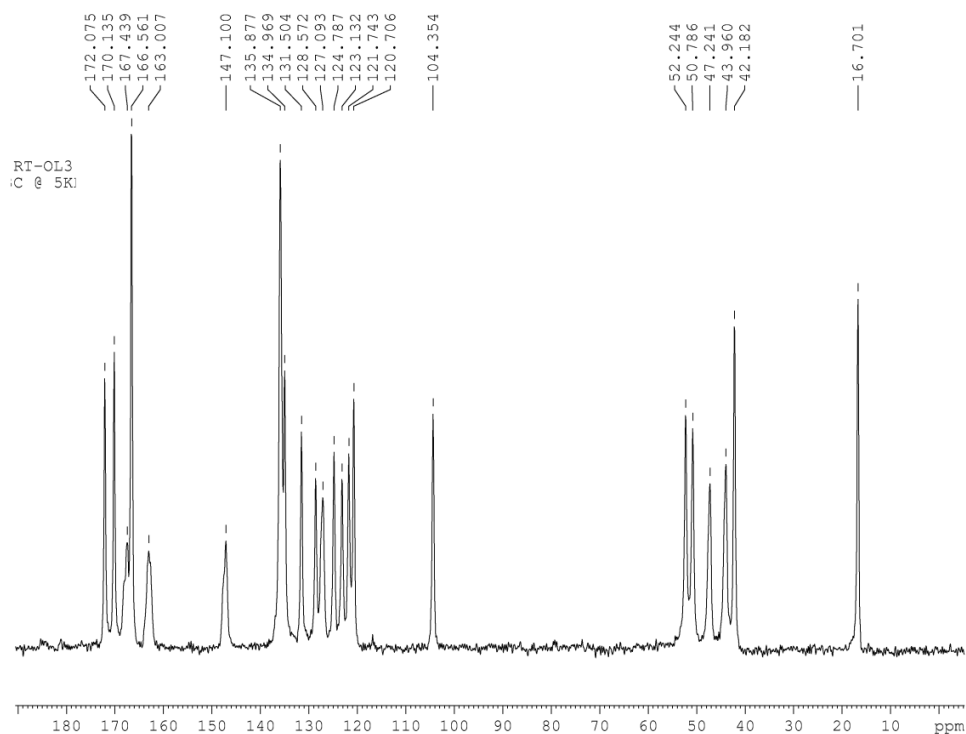

Figure S11 ss-NMR of crystalline olanzapinium dimaleate 1:2 salt.

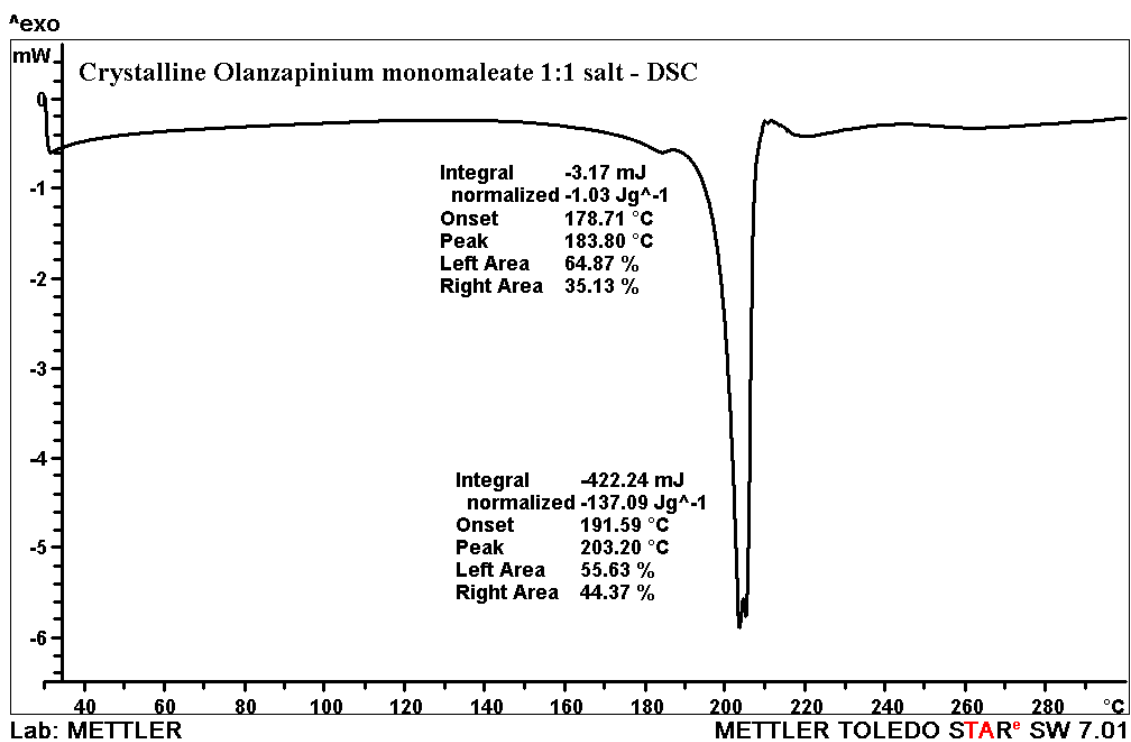

Figure S12 DSC of crystalline olanzapinium monomaleate 1:1 salt.

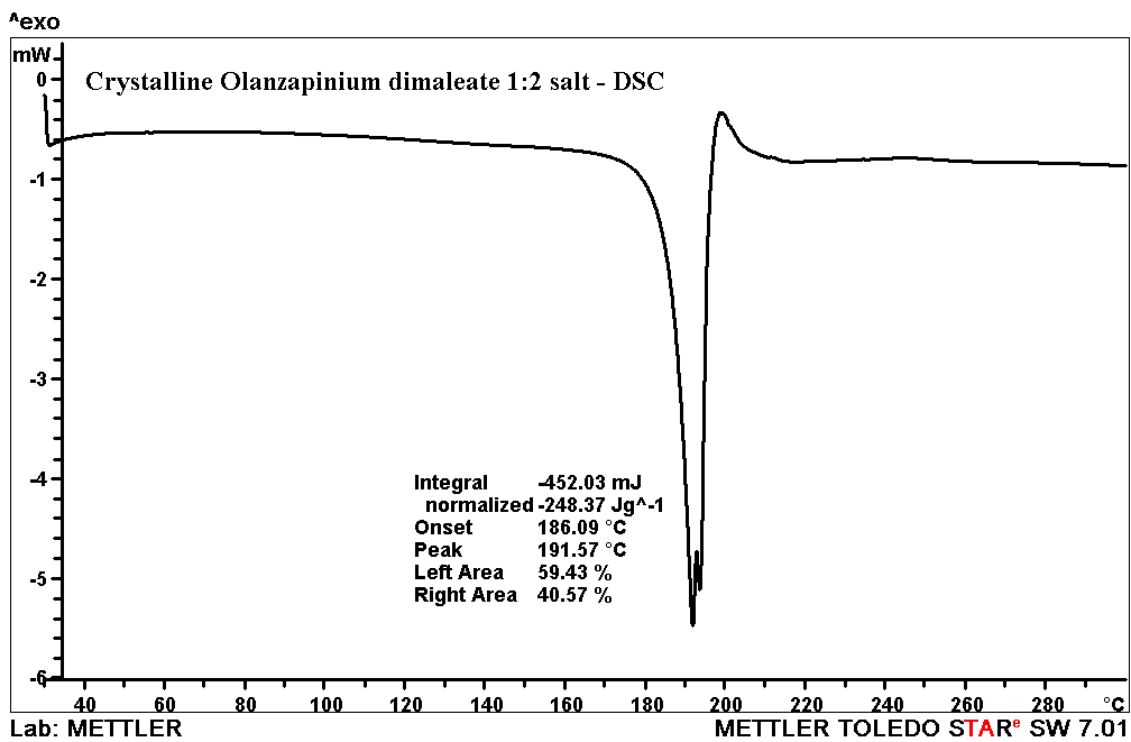

Figure S13 DSC of crystalline olanzapinium dimaleate 1:2 salt.

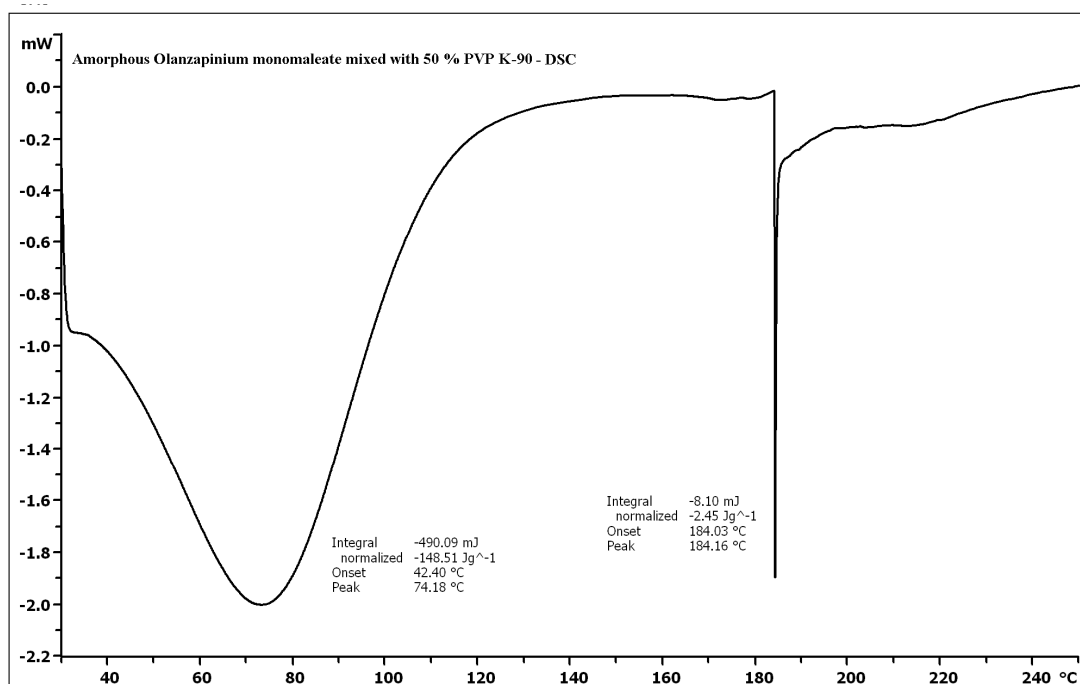

**Figure S14** DSC of amorphous olanzapinium monomaleate after addition of 50% by weight PVP K-90 polymer the  $T_g$  from 60 °C (pure material) to 74 °C.

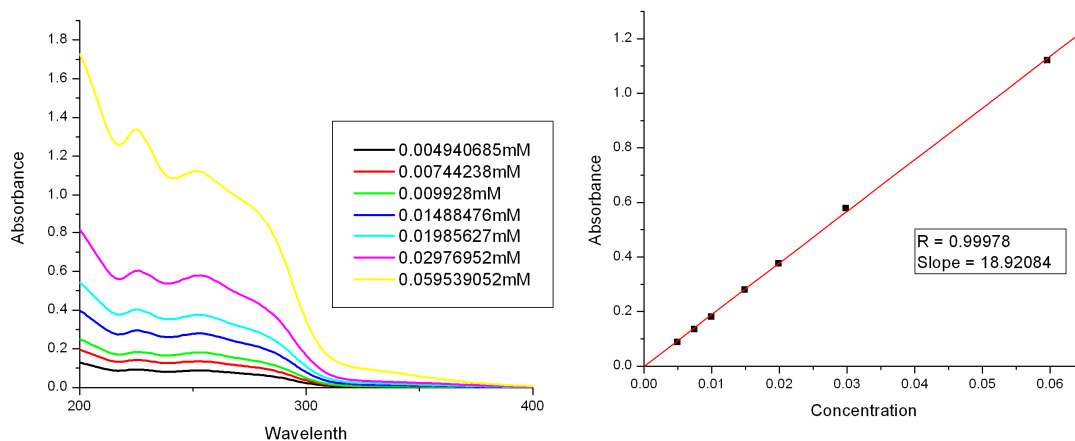

**Figure S15** Absorption vs. wavelength and concentration vs. absorption curve for the standard solution of olanzapine free base in distilled water.

#### **Preparation of the saturated solution of olanzapine base in distilled water:**

Excess amount of OLN base was added to 8-10 mL of distilled water to make a saturated solution such that the undissolved solid was clearly visible. This slurry was stirred for 48 h, filtered material and the solution was diluted to get the absorbance value A within 1 in the UV-Vis spectrum. The XRPD of the residual precipitate was collected to check its solid-state nature.

#### **Calculation:**

Beer Lambert's Law:  $A = \epsilon cl$

where A is the absorbance,  $\epsilon$  is coefficient of absorbance, c is the concentration and l is path length of the sample.

#### **Olanzapine base in distilled water:**

For the saturated solution  $A = 0.130$  (20 times dilution) at  $\lambda = 253$  nm,  $l = 1$  cm,  $\epsilon = 18.92084$  /mmol/cm

Hence concentration of the saturated solution is **0.04293 mg/mL or 42.93 mg/L**.

The solubility of olanzapinium maleate salts were calculated in the same way.

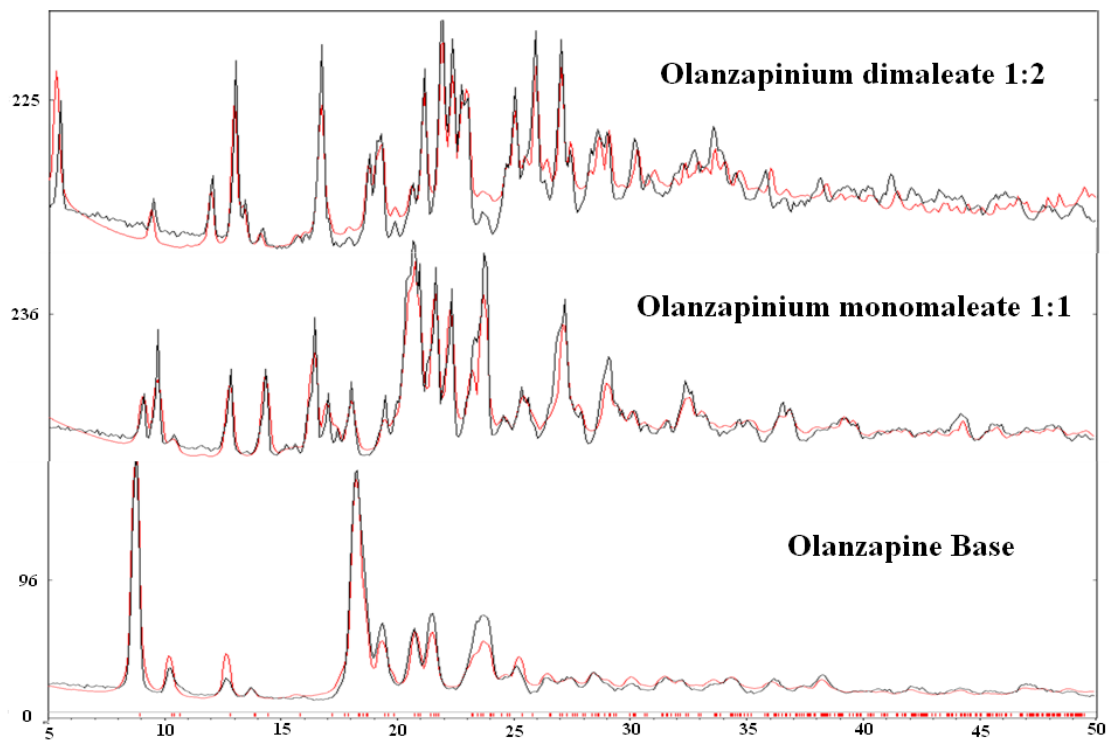

**Figure S16** XRPD pattern of the olanzapine base and the crystalline salts after completion of the dissolution experiment and overlay of the calculated lines from the crystal structure confirm that the salts are stable during the dissolution experiment.

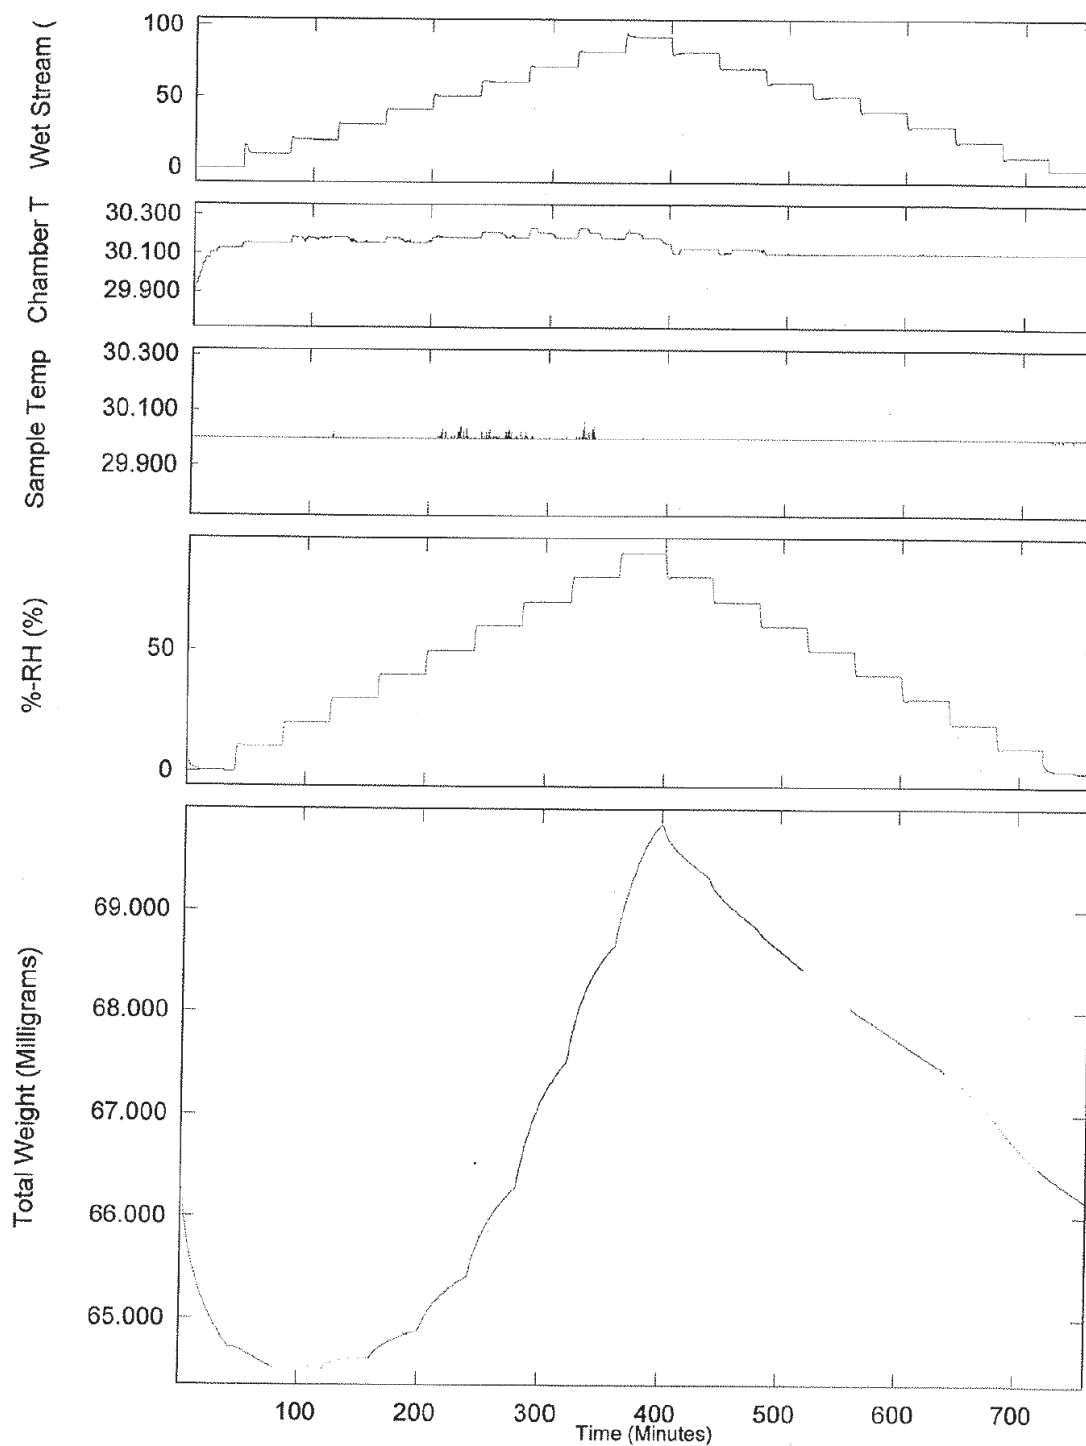

**Figure S17** Dynamic vapour sorption (DVS) experimental conditions for amorphous OLN monomaleate.
